# Supplementary material for: Naturally Occurring Montmorillonite-Based Polymer Monolith Composites as Stationary Phases for Capillary Liquid and Gas Chromatography
Source: MDPI journal article supplement (doi:10.3390/separations9120389), 2022-11-23

## Supplementary Materials for

Naturally occurring montmorillonite-based polymer monolith composites as stationary phases  
for capillary liquid and gas chromatography

Ahmad Aqel<sup>1,2,\*</sup>, Munir Obbed<sup>1,3</sup>, Ayman A. Ghfar<sup>1,2</sup>, Kareem Yusuf<sup>1</sup>, Ameen M. Alsubhi<sup>1</sup> and  
A. Badjah-Hadj-Ahmed<sup>1</sup>

<sup>1</sup>Department of Chemistry, College of Science, King Saud University, Riyadh 11451, Saudi  
Arabia

<sup>2</sup>Advanced Materials Research Chair, Department of Chemistry, College of Science, King Saud  
University, Riyadh 11451, Saudi Arabia

<sup>3</sup>Department of Chemistry, College of Science, Hadhramout University, Mukalla, Yemen

\*Corresponding Author:

**Ahmad Aqel**

Tel.: +966 11 4676009

E-mail: aifseisi@ksu.edu.sa

Fax: +96614675992

P.O. Box 2455 Riyadh 11451 Saudi Arabia

Orcid iD: 0000-0001-7895-6895

### Summary

This supporting information files includes additional results as described in the main article:

-Figure captions

-Figures S1 to S4

## Figure captions

Figure S1 the N<sub>2</sub> adsorption and desorption isotherms of (A) poly(GMA-co-EDMA) and (B) MMT@poly(GMA-co-EDMA) composite.

Figure S2 TGA plots of the MMT@poly(GMA-co-EDMA) composites corresponding to 1.0 mg mL<sup>-1</sup> MMT (A) and 5.0 mg mL<sup>-1</sup> MMT (B). The samples were heated from 25 to 500°C with a heating rate of 10°C min<sup>-1</sup>.

Figure S3 Typical GC chromatogram of alkylbenzene series (12.5%, v/v% for each compound) at the optimal conditions using a commercial open-tubular capillary column. Compounds by order of elution: benzene, toluene, ethylbenzene, propylbenzene, butylbenzene, pentylbenzene, hexylbenzene, and heptylbenzene.

Figure S4 Typical HPLC chromatogram of alkylbenzene series (10 µg mL<sup>-1</sup> for each compound) at the optimal conditions using a commercial packed column. Compounds by order of elution: benzene, toluene, ethylbenzene, propylbenzene, butylbenzene, pentylbenzene, hexylbenzene, and heptylbenzene.

Figure S1

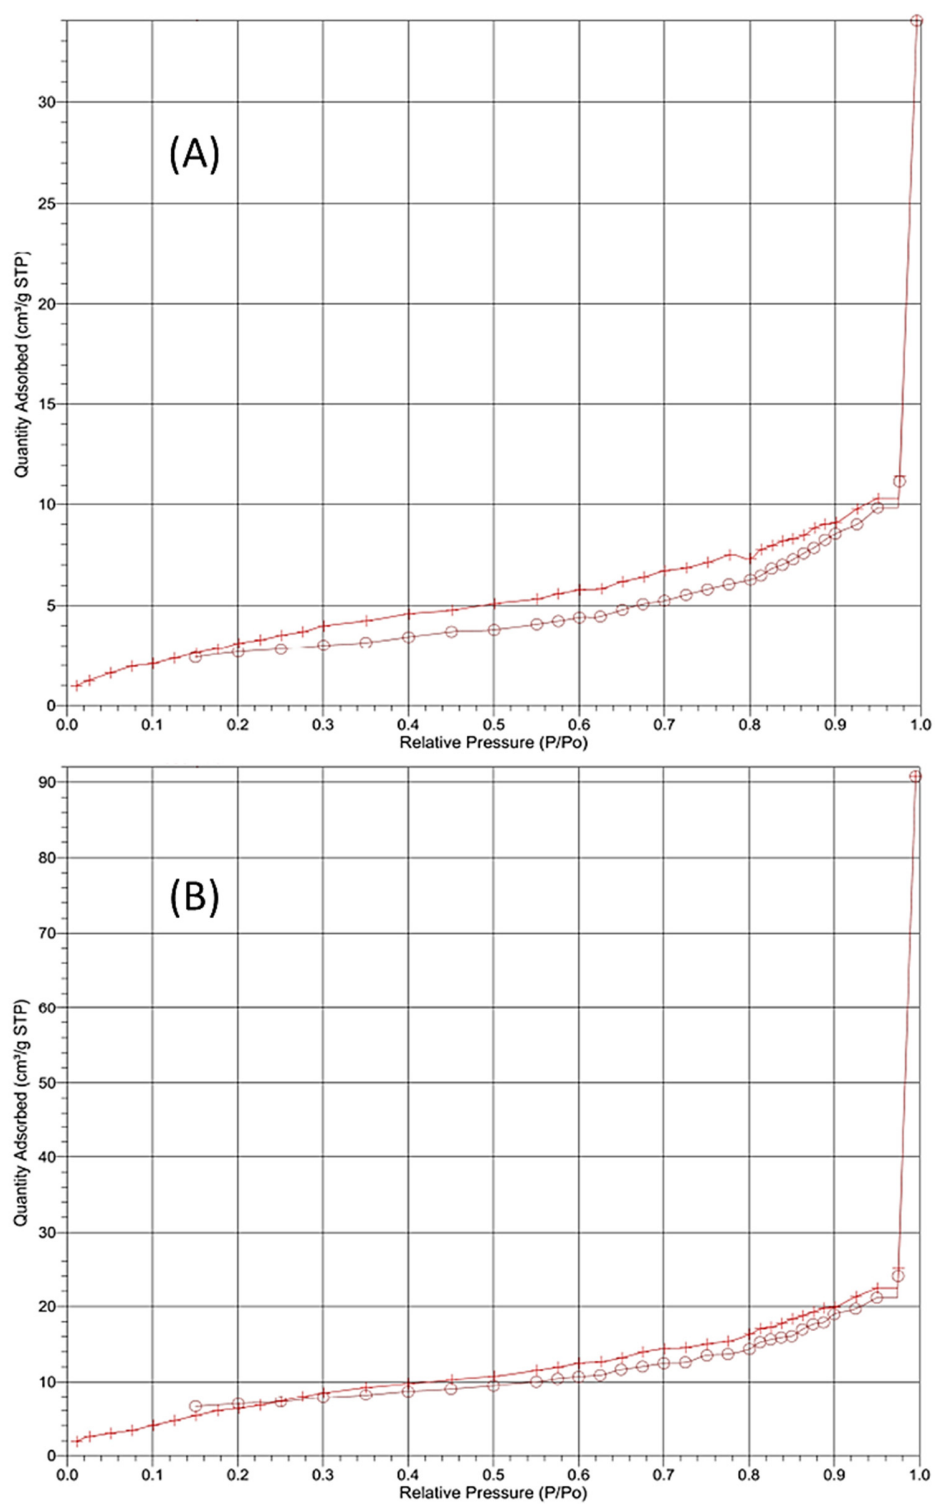

Figure S2

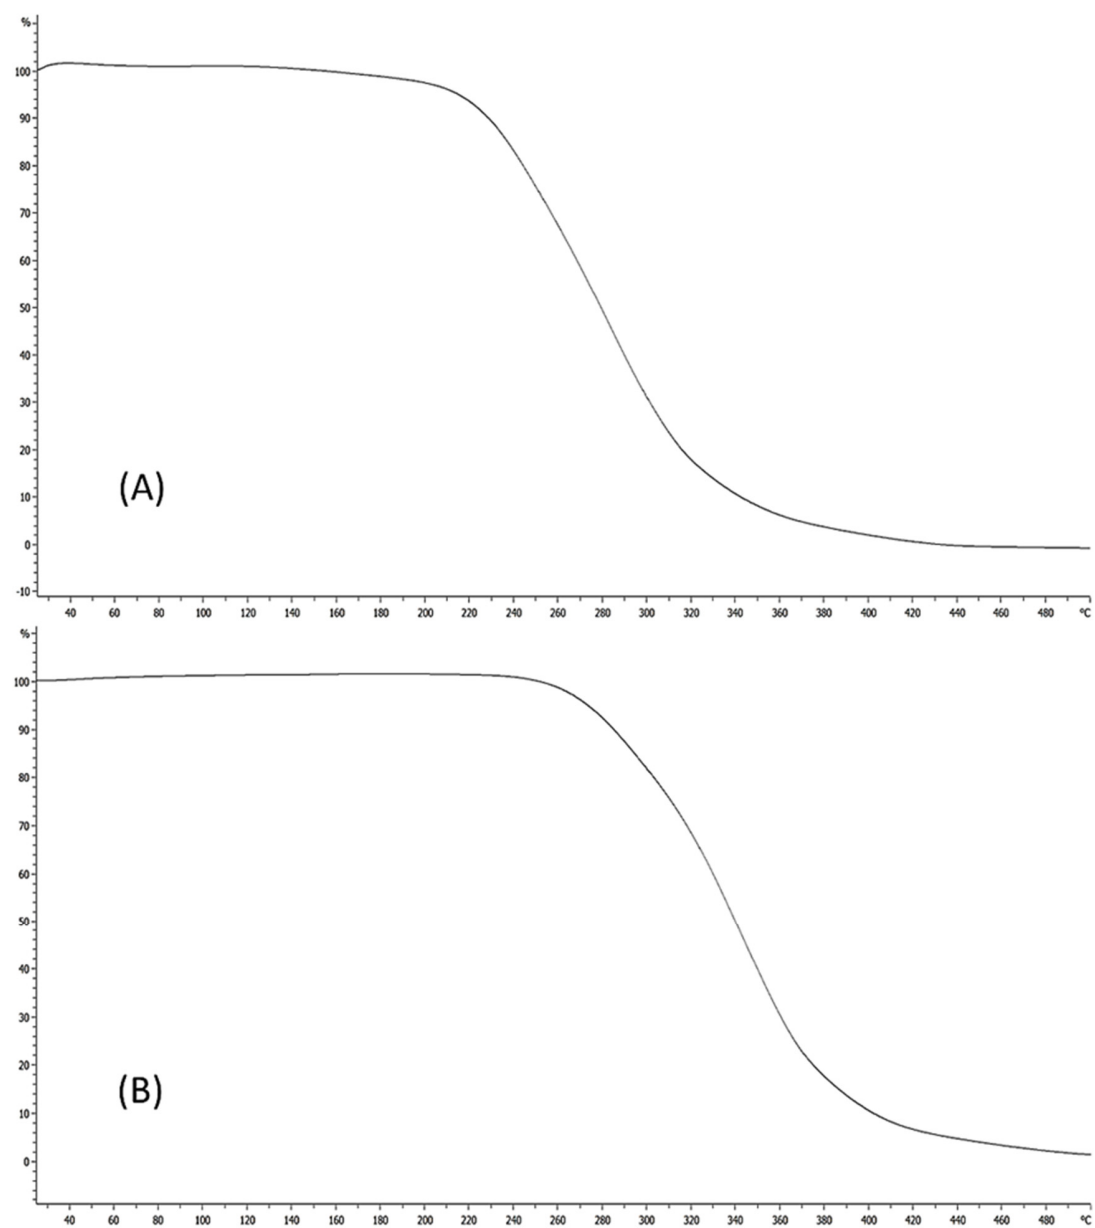

Figure S3

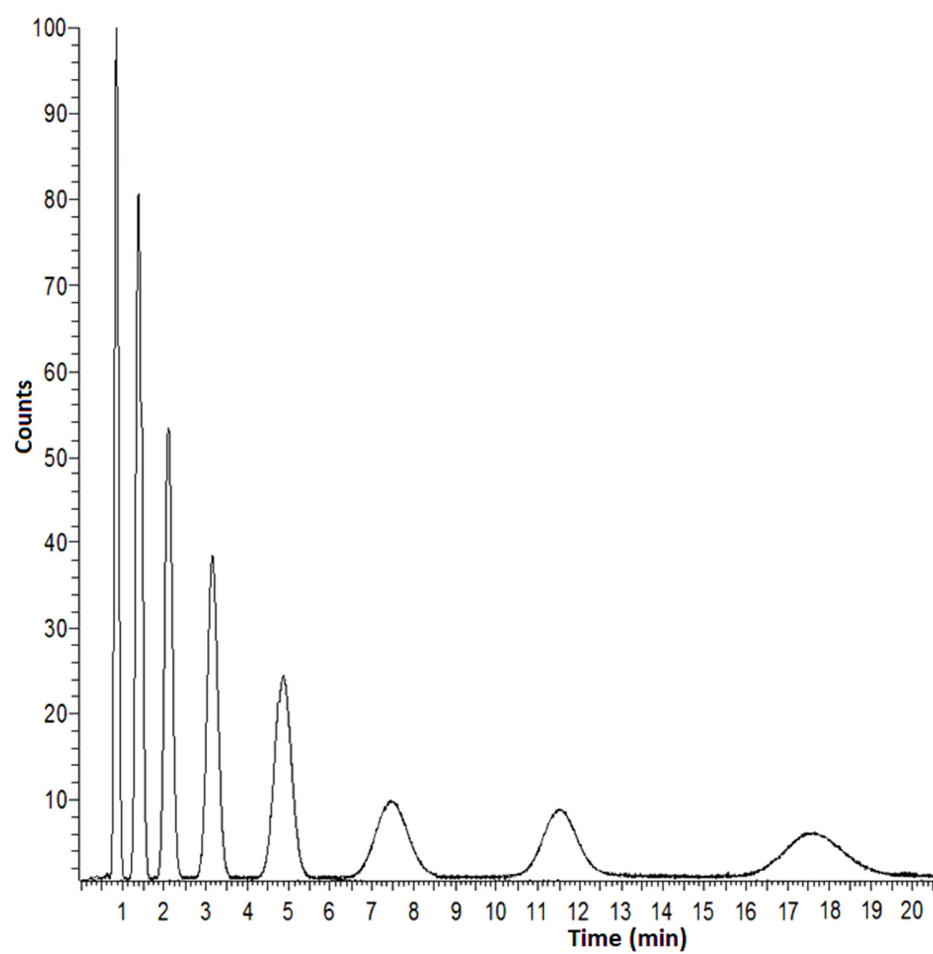

Figure S4

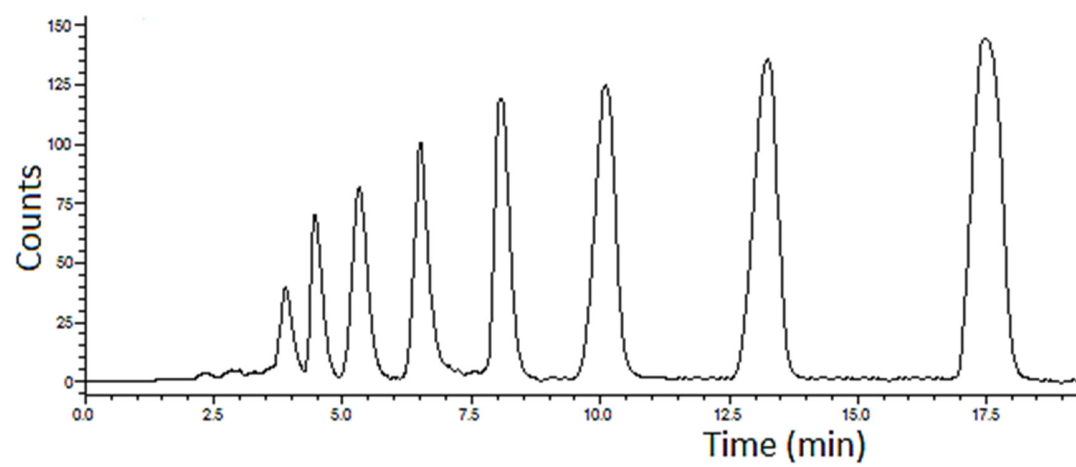

Supplement: s1 [file s1]
